# Supplementary material
Source: publisher figshare collection journal article supplement (https://acs.figshare.com/ndownloader/files/5122108)

# **Cu(I) Catalyst in DMF: An Efficient Catalytic System for the Synthesis of Furans from 2-(1-Alkynyl)-2-alken-1-ones**

Nitin T. Patil, Huanyou Wu, and Yoshinori Yamamoto\*

*Department of Chemistry, Graduate School of Science, Tohoku University,  
Sendai 980-8578, Japan*

## **Contents of Supporting Information**

(17 Pages)

Page S-1: Title of the paper, author's name and address along with the contents.

Page S-2: General procedure for the cyclization of 2-(1-alkynyl)-2-alken-1-ones and characterization data of compounds **3b**, **3c**, **3e**

Page S-3: Characterization data of compounds **3g**, **3h**, **3k**, **3m**, **3o** and references

Page S-4: <sup>1</sup>H NMR spectrum of compound **3a**

Page S-5: <sup>1</sup>H NMR spectrum of compound **3b**

Page S-6: <sup>1</sup>H NMR spectrum of compound **3c**

Page S-7: <sup>1</sup>H NMR spectrum of compound **3e**

Page S-8: <sup>1</sup>H NMR spectrum of compound **3f**

Page S-9: <sup>1</sup>H NMR spectrum of compound **3g**

Page S-10: <sup>1</sup>H NMR spectrum of compound **3h**

Page S-11: <sup>1</sup>H NMR spectrum of compound **3i**

Page S-12: <sup>1</sup>H NMR spectrum of compound **3j**

Page S-13: <sup>1</sup>H NMR spectrum of compound **3k**

Page S-14: <sup>1</sup>H NMR spectrum of compound **3l**

Page S-15: <sup>1</sup>H NMR spectrum of compound **3m**

Page S-16: <sup>1</sup>H NMR spectrum of compound **3n**

Page S-17: <sup>1</sup>H NMR spectrum of compound **3o**

**General Procedure for the cyclization of 2-(1-alkynyl)-2-alken-1-ones.** The preparation of **3a** is representative. To a mixture of 2-(1-alkynyl)-2-alken-1-one **1a** (0.040 g, 0.2 mmol), MeOH (0.010 g, 0.3 mmol), Cu(I)Br (0.003 g, 0.02 mmol) was added DMF (0.2 mL) and the mixture was stirred until the disappearance of starting material on TLC at 80 °C. Water (10 ml) was added and the product was extracted with ethyl acetate. The extracts were washed with water and dried over anhydrous sodium sulfate. The solvent was removed, and the residue was then filtered through a short silica gel column using hexane/AcOEt, 99:1 as an eluent to give pure product **3a** (0.037 g, 81%).

Structure of **3a**, **3f**, **3i**, **3j**, **3l**, **3n** are known in the literature.<sup>1</sup> The characterization data for the newly synthesized compounds **3b**, **3c**, **3e**, **3g**, **3h**, **3k**, **3m**, **3o** as well as the copies of the <sup>1</sup>H NMR spectra of all products are given below.

**(3b).** <sup>1</sup>H NMR (CDCl<sub>3</sub>, 400 MHz) δ 7.61 (d, *J* = 7.6 Hz, 2H), 7.34 (t, *J* = 7.6 Hz, 2H), 7.20 (t, *J* = 7.6 Hz, 1H), 6.61 (s, 1H), 4.37 (t, *J* = 4.4 Hz, 1H), 3.62-3.51 (m, 2H), 2.75-2.68 (m, 1H), 2.63-2.56 (m, 1H), 2.10-2.01 (m, 1H), 1.96-1.91 (m, 1H), 1.85-1.78 (m, 2H), 1.64-1.54 (m, 2H), 1.46-1.37 (m, 2H), 0.94 (t, *J* = 7.2 Hz, 3H); <sup>13</sup>C NMR (CDCl<sub>3</sub>, 100 MHz) δ 152.6, 152.1, 131.1, 128.5, 126.7, 123.5, 120.4, 105.2, 71.0, 68.4, 32.3, 28.9, 23.3, 19.5, 19.1, 14.0; HRMS calcd for C<sub>18</sub>H<sub>22</sub>O<sub>2</sub> (M<sup>+</sup>) 270.1620, found 270.1614.

**(3c).** <sup>1</sup>H NMR (CDCl<sub>3</sub>, 400 MHz) δ 7.62-7.59 (d, *J* = 7.6 Hz, 2H), 7.33 (t, *J* = 7.6 Hz, 2H), 7.21 (t, *J* = 7.6 Hz, 1H), 6.58 (s, 1H), 4.46-4.44 (t, *J* = 4.0 Hz, 1H), 3.86-3.79 (m, 1H), 2.74-2.69 (m, 1H), 2.62-2.57 (m, 1H), 2.09-2.02 (m, 1H), 1.87-1.80 (m, 3H), 1.23 (t, *J* = 7.2 Hz, 6H); <sup>13</sup>C NMR (CDCl<sub>3</sub>, 100 MHz) δ 152.5, 152.2, 131.2, 128.4, 126.7, 123.4, 120.9, 104.9, 69.4, 68.5, 29.8, 23.3, 23.2, 22.8, 19.2; HRMS calcd for C<sub>17</sub>H<sub>20</sub>O<sub>2</sub> (M<sup>+</sup>) 256.1463, found 256.1458.

**(3e).** <sup>1</sup>H NMR (CDCl<sub>3</sub>, 400 MHz) δ 7.54 (d, *J* = 8.0 Hz, 2H), 7.27 (t, *J* = 8.0 Hz, 2H), 7.14 (t, *J* = 8.0 Hz, 1H); 6.54 (s, 1H), 5.83-5.75 (m, 1H), 5.07-4.96 (m, 2H), 4.33 (t, *J* = 4.4 Hz, 1H), 3.58-3.52 (m, 2H), 2.67-2.62 (m, 1H), 2.57-2.50 (m, 1H), 2.34-2.29 (m, 2H), 2.00-1.96 (m, 1H), 1.88-1.84 (m, 1H), 1.79-1.63 (m, 3H); <sup>13</sup>C NMR (CDCl<sub>3</sub>, 100 MHz) δ 152.7, 152.1, 135.3, 131.1, 128.5, 126.8, 123.4, 120.2, 116.2, 105.2, 71.1, 67.9, 34.7, 28.9, 23.3, 19.1; HRMS calcd for C<sub>18</sub>H<sub>20</sub>O<sub>2</sub> (M<sup>+</sup>) 268.1463, found 268.1461.

**(3g).**  $^1\text{H}$  NMR ( $\text{CDCl}_3$ , 400 MHz)  $\delta$  7.69 (d,  $J = 8.4$  Hz, 2H), 7.58 (d,  $J = 8.4$  Hz, 2H), 6.76 (s, 1H), 4.29 (t,  $J = 4.0$  Hz, 1H), 3.45 (s, 3H), 2.77-2.70 (m, 1H), 2.66-2.58 (m, 1H), 2.17-1.92 (m, 2H), 1.88-1.79 (m, 2H);  $^{13}\text{C}$  NMR ( $\text{CDCl}_3$ , 100 MHz)  $\delta$  153.9, 150.7, 134.14, 128.2, 125.6, 123.2, 120.4, 107.3, 72.3, 56.2, 28.3, 23.3, 18.9; HRMS calcd for  $\text{C}_{16}\text{H}_{15}\text{F}_3\text{O}_2$  ( $\text{M}^+$ ) 296.1024, found 296.1019.

**(3h).**  $^1\text{H}$  NMR ( $\text{CDCl}_3$ , 400 MHz)  $\delta$  7.50 (d,  $J = 8.4$  Hz, 2H), 7.15 (d,  $J = 8.4$  Hz, 2H), 6.58 (s, 1H), 4.29 (t,  $J = 4.0$  Hz, 1H), 3.44 (s, 3H), 2.75-2.65 (m, 1H), 2.64-2.55 (m, 1H), 2.32 (s, 3H), 2.1-1.77 (m, 4H);  $^{13}\text{C}$  NMR ( $\text{CDCl}_3$ , 100 MHz)  $\delta$  152.3, 136.6, 129.4, 128.7, 123.3, 119.7, 104.5, 72.3, 56.1, 28.5, 23.3, 21.3, 19.0; HRMS calcd for  $\text{C}_{16}\text{H}_{18}\text{O}_2$  ( $\text{M}^+$ ) 242.1307, found 242.1301.

**(3k).**  $^1\text{H}$  NMR ( $\text{CDCl}_3$ , 400 MHz)  $\delta$  7.74-7.07 (m 10H), 6.70 (s, 1H), 6.46 (s, 1H), 4.27 (m, 1H), 1.27 (d,  $J = 6.0$  Hz, 3H), 1.24 (d,  $J = 6.0$  Hz, 3H);  $^{13}\text{C}$  NMR ( $\text{CDCl}_3$ , 100 MHz)  $\delta$  154.4, 150.6, 146.6, 131.3, 128.8, 128.7, 128.5, 128.3, 128.2, 124.8, 123.8, 121.6, 116.2, 103.4, 96.0, 70.6, 23.7, 22.5; HRMS calcd for  $\text{C}_{20}\text{H}_{18}\text{O}_3$  ( $\text{M}^+$ ) 306.1256, found 306.1257.

**(3m).**  $^1\text{H}$  NMR ( $\text{CDCl}_3$ , 400 MHz)  $\delta$  7.67-7.25 (m, 15H), 6.63 (s, 1H), 5.69 (s, 1H), 3.79-3.76 (m, 1H), 1.27 (2d,  $J = 6.0$  Hz, 6H);  $^{13}\text{C}$  NMR ( $\text{CDCl}_3$ , 100 MHz)  $\delta$  154.6, 141.8, 134.4, 133.8, 131.3, 129.9, 128.6, 128.5, 128.4, 128.3, 127.9, 127.4, 126.4, 124.1, 122.3, 105.5, 72.6, 69.1, 22.5, 22.1; HRMS calcd for  $\text{C}_{28}\text{H}_{24}\text{O}_2$  ( $\text{M}^+$ ) 392.1776, found 392.1774.

**(3o).**  $^1\text{H}$  NMR ( $\text{CDCl}_3$ , 400 MHz)  $\delta$  7.56 (d,  $J = 7.6$  Hz, 2H), 7.40-7.16 (m, 7H), 6.47 (s, 1H), 5.43 (s, 1H), 3.70-3.63 (m, 1H), 2.37 (s, 3H), 1.22 (d,  $J = 6.0$  Hz, 6H);  $^{13}\text{C}$  NMR ( $\text{CDCl}_3$ , 100 MHz)  $\delta$  151.5, 148.2, 142.4, 130.9, 128.4, 128.3, 127.2, 126.7, 126.6, 123.3, 123.1, 105.6, 72.9, 68.6, 22.3, 12.3; HRMS calcd for  $\text{C}_{21}\text{H}_{22}\text{O}_2$  ( $\text{M}^+$ ) 306.1620, found 306.1618.

## References

1. Yao, T.; Zhang, X.; Larock, R. C. *J. Am. Chem. Soc.* **2004**, *126*, 11164-11165.

C:\Documents and Settings\All Users\

t5-23  
Thu Oct 07 11:08:45 2004

DFILE  
COMPT  
DATIM  
ORNUC  
EXMOD  
OBFRO  
OBSSET  
OBF IN  
POINT  
FREQU  
SCANS  
ACQTM  
PD  
PWI  
IRNUC  
CTEMP  
SLVNT  
EXREF  
BF  
RGAIN

1H  
NON  
399.65 MHz  
124.00 kHz  
10500.00 Hz  
32768  
7993.60 Hz  
8  
4.0993 sec  
2.9010 sec  
5.50 usec  
23.9 C  
CDCL3  
0.00 ppm  
0.12 Hz  
17

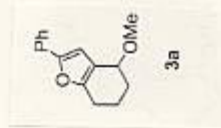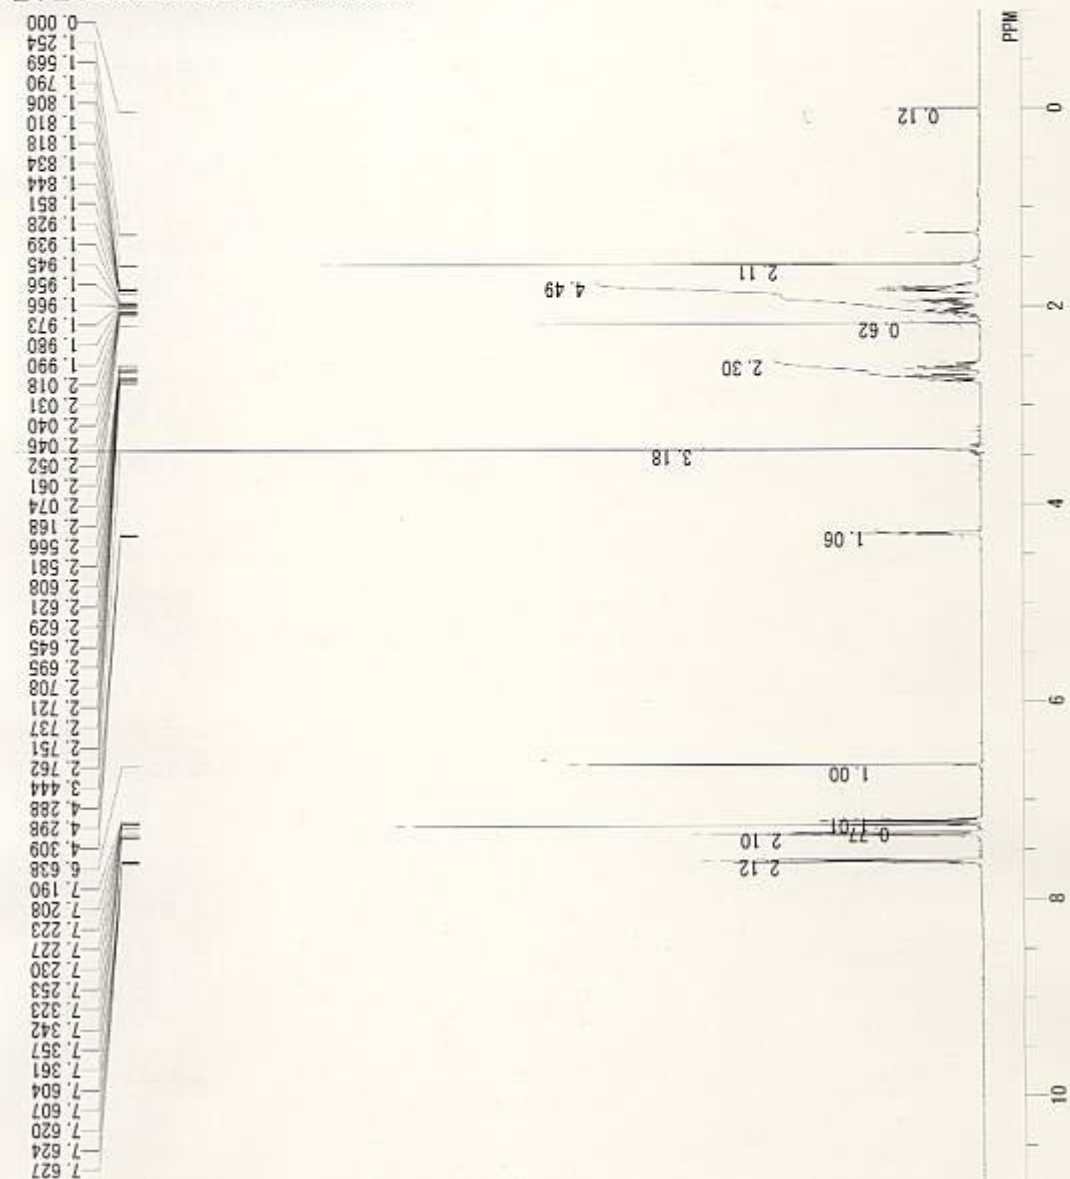

C:\Documents and Settings\All Users\WD

t5-29 product  
Thu Oct 14 10:54:07 2004

DFILE  
COMMIT  
DATIN  
ORNUC  
EXMOD  
ORFRO  
ORSET  
ORFIN  
POINT  
FREQ  
SCANS  
ACQTN  
PD  
PMT  
IRNUC  
CTEMP  
SLVIT  
EXREF  
BF  
RGAIN

1H  
NON  
399.65 MHz  
124.00 KHz  
10500.00 Hz  
32768  
7993.60 Hz  
8  
4.0993 sec  
2.9010 sec  
5.50 usec  
1H  
CDCL3  
23.1 c  
0.00 ppm  
0.40 Hz  
17

0.000  
0.917  
0.936  
0.954  
0.985  
1.385  
1.403  
1.422  
1.441  
1.564  
1.582  
1.602  
1.612  
1.619  
1.635  
1.790  
1.809  
1.820  
1.833  
1.840  
1.851  
1.901  
1.912  
1.919  
1.930  
2.047  
2.053  
2.059  
2.169  
2.196  
2.218  
2.232  
2.264  
2.297  
2.310  
2.339  
2.352  
2.355  
2.358  
2.368  
2.379  
2.399  
2.415  
2.434  
2.453  
2.472  
2.491  
2.510  
2.529  
2.548  
2.567  
2.586  
2.605  
2.624  
2.643  
2.662  
2.681  
2.700  
2.719  
2.738  
2.757  
2.776  
2.795  
2.814  
2.833  
2.852  
2.871  
2.890  
2.909  
2.928  
2.947  
2.966  
2.985  
2.999

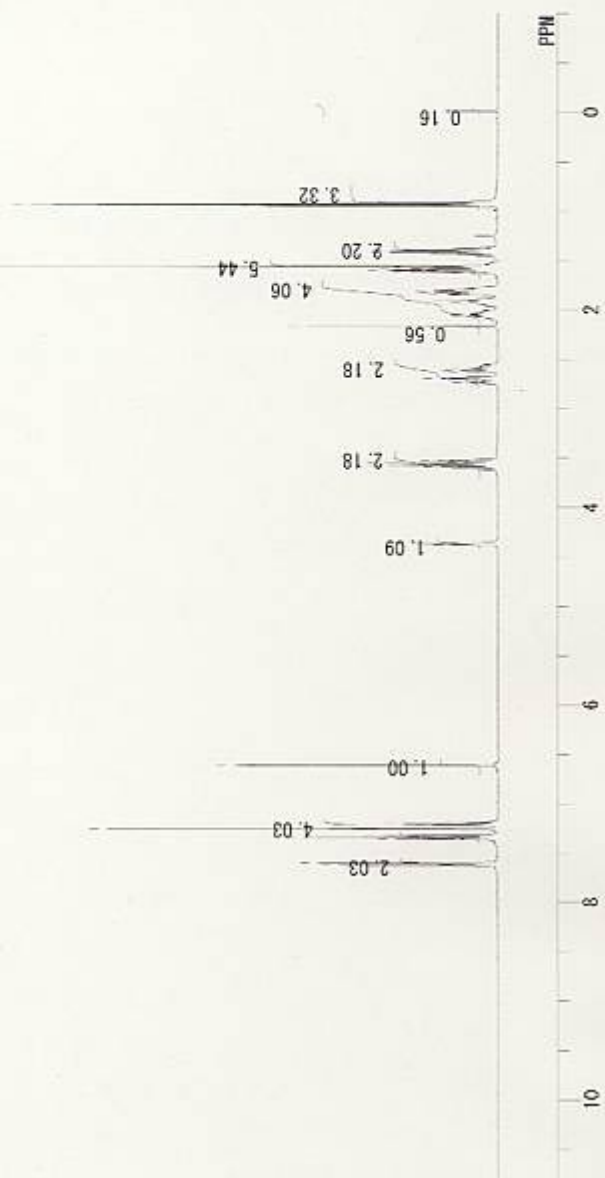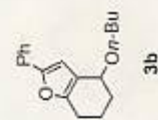

[illegible]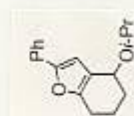

3

7524

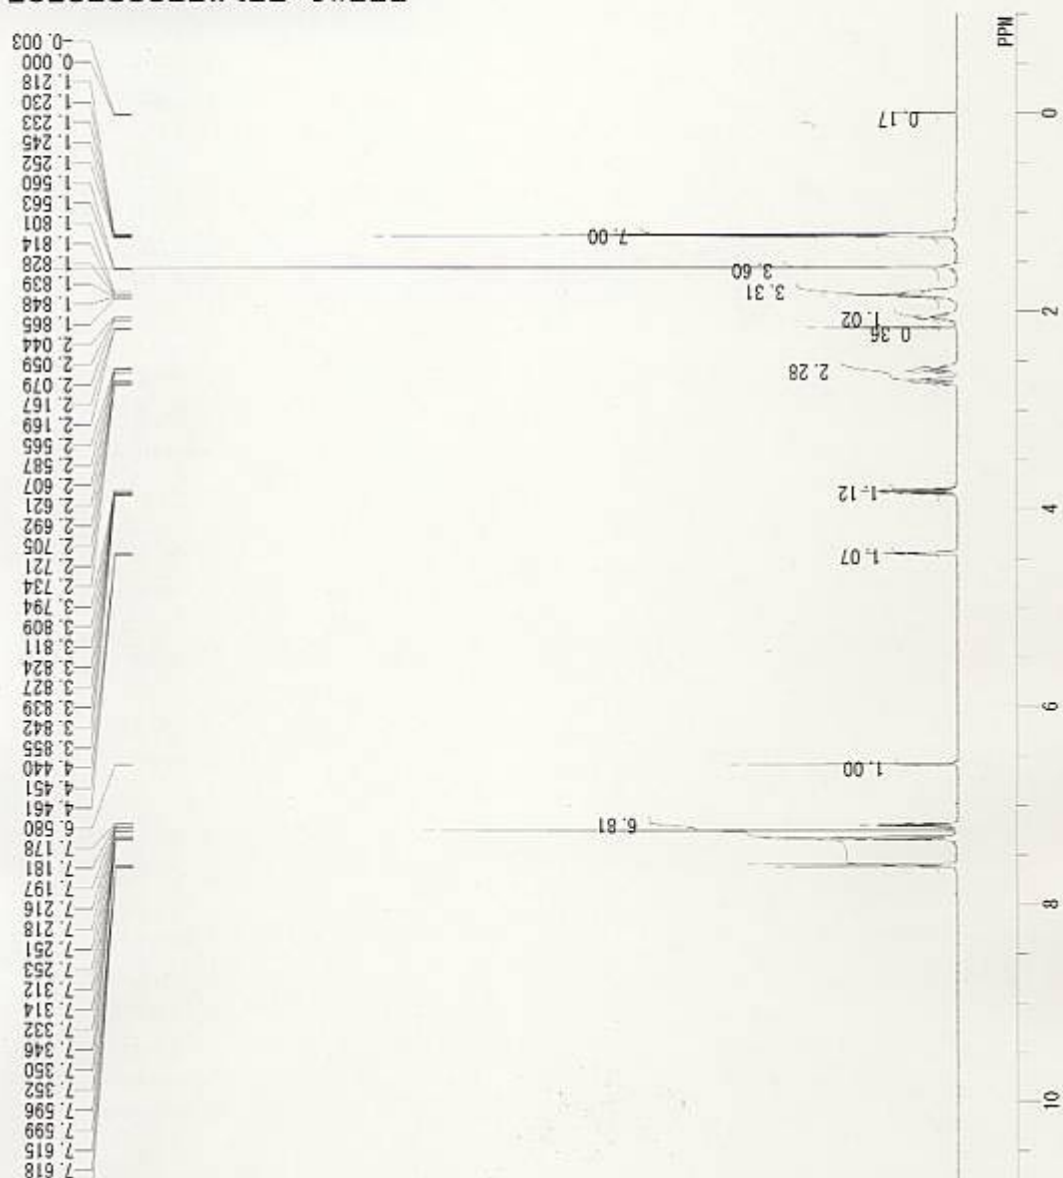

C:\Documents and Settings\VAI\Users\VO

t5-32 product  
Fri Oct 15 17:35:11 2004

DTITLE  
COMMIT  
DATIN  
ORNUC  
EXMOD  
ORFRO  
ORSET  
ORFIN  
POINT  
FREQ  
SCANS  
ACQTM  
PD  
PWI  
IRNUC  
CTEMP  
SLVNT  
EXREF  
BF  
RGAIN

1.491  
1.647  
1.650  
1.663  
1.665  
1.724  
1.745  
1.753  
1.767  
1.775  
1.785  
1.838  
1.849  
1.856  
1.866  
1.892  
2.099  
2.286  
2.303  
2.320  
2.336  
2.528  
2.549  
2.565  
2.617  
2.629  
2.642  
3.520  
3.526  
3.542  
3.559  
3.577  
3.582  
4.315  
4.326  
4.337  
4.969  
4.994  
5.021  
5.024  
5.063  
5.068  
5.762  
5.768  
5.805  
5.831  
6.544  
7.117  
7.135  
7.153  
7.183  
7.250  
7.269  
7.289  
7.530  
7.532  
7.550

399.65 MHz  
124.00 KHz  
10500.00 Hz  
32768  
7993.60 Hz  
8  
4.0993 sec  
2.9010 sec  
5.50 usec  
1H  
23.7 c  
CDCl3  
0.00 ppm  
0.10 Hz  
19

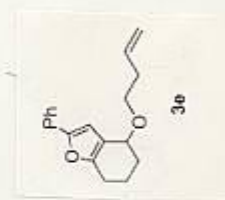

PPM

0.11  
1.74  
0.28  
1.06  
1.67  
0.77  
1.00  
2.07  
4.59  
13.28

[illegible]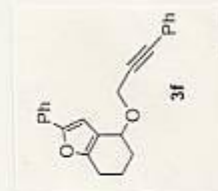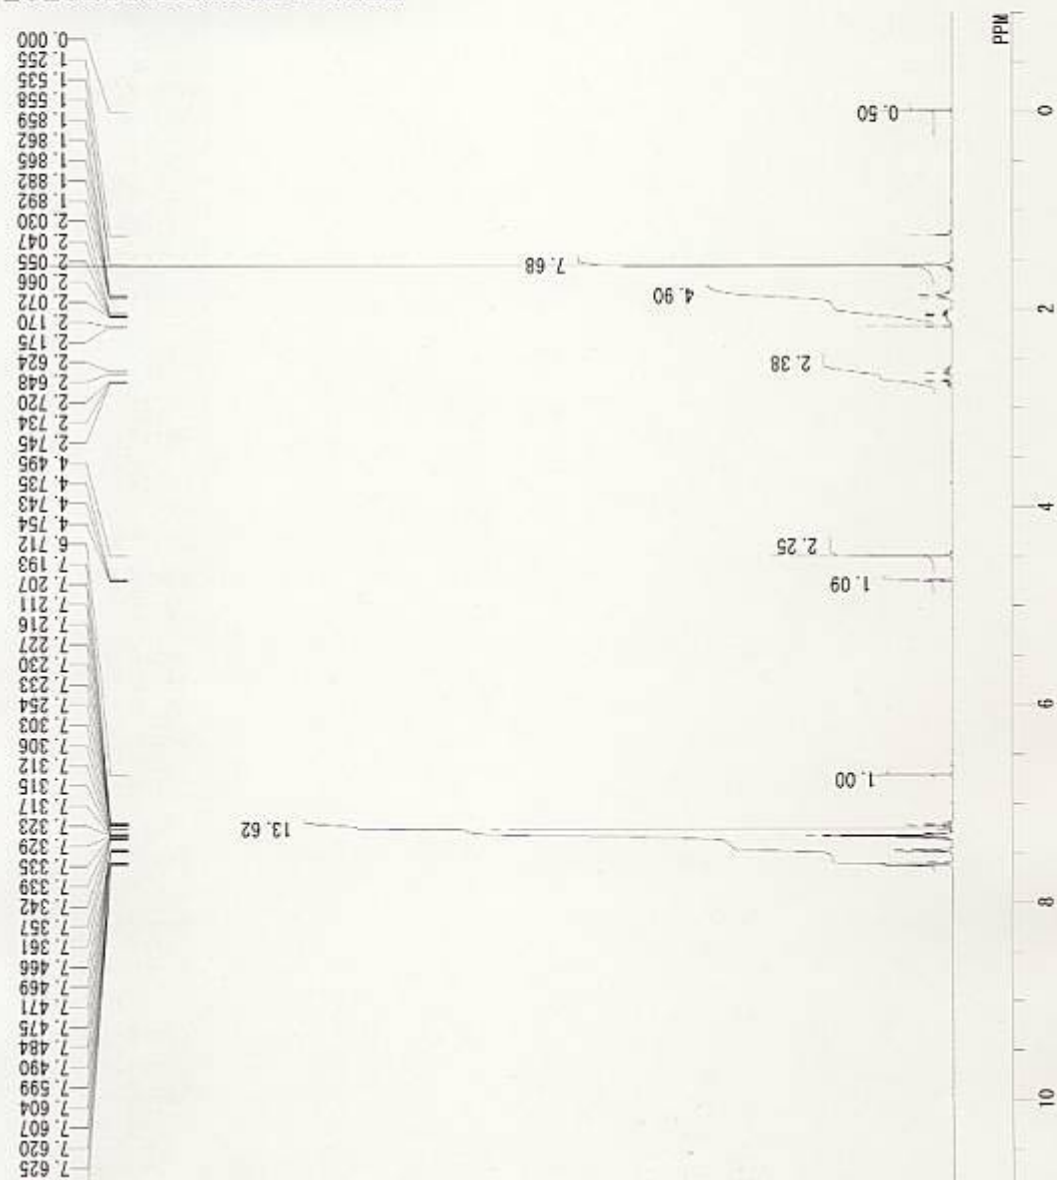



C:\Documents and Settings\VAI\Users\VO

t5-37 product

Thu Oct 21 13:53:08 2004

DTITLE  
 COMMT  
 DATIN  
 OBNUC  
 EXMOD  
 OBFRQ  
 OBSET  
 OBFTN  
 POINT  
 FREQU  
 SCANS  
 ACQTN  
 PD  
 PWT  
 IRNUC  
 CTEMP  
 SLVIT  
 EXREF  
 BF  
 RGAIN

0.002  
 0.000  
 0.895  
 0.902  
 0.921  
 1.255  
 1.319  
 1.561  
 1.794  
 1.804  
 1.825  
 1.832  
 1.848  
 1.856  
 1.859  
 1.866  
 1.931  
 1.943  
 1.950  
 1.959  
 1.967  
 1.970  
 1.977  
 1.984  
 2.026  
 2.034  
 2.039  
 2.048  
 2.054  
 2.060  
 2.069  
 2.075  
 2.166  
 2.169  
 2.578  
 2.592  
 2.599  
 2.620  
 2.634  
 2.642  
 2.656  
 2.706  
 2.719  
 2.732  
 2.748  
 2.762  
 3.445  
 3.448  
 4.290  
 4.301  
 4.312  
 6.760  
 7.251  
 7.254  
 7.574  
 7.594  
 7.688

399.65 MHz  
 124.00 KHz  
 10500.00 Hz  
 32768  
 7993.60 Hz  
 8  
 4.0993 sec  
 2.9010 sec  
 5.50 usec  
 1H  
 24.8 c  
 CDCL3  
 0.00 ppm  
 0.10 Hz  
 17

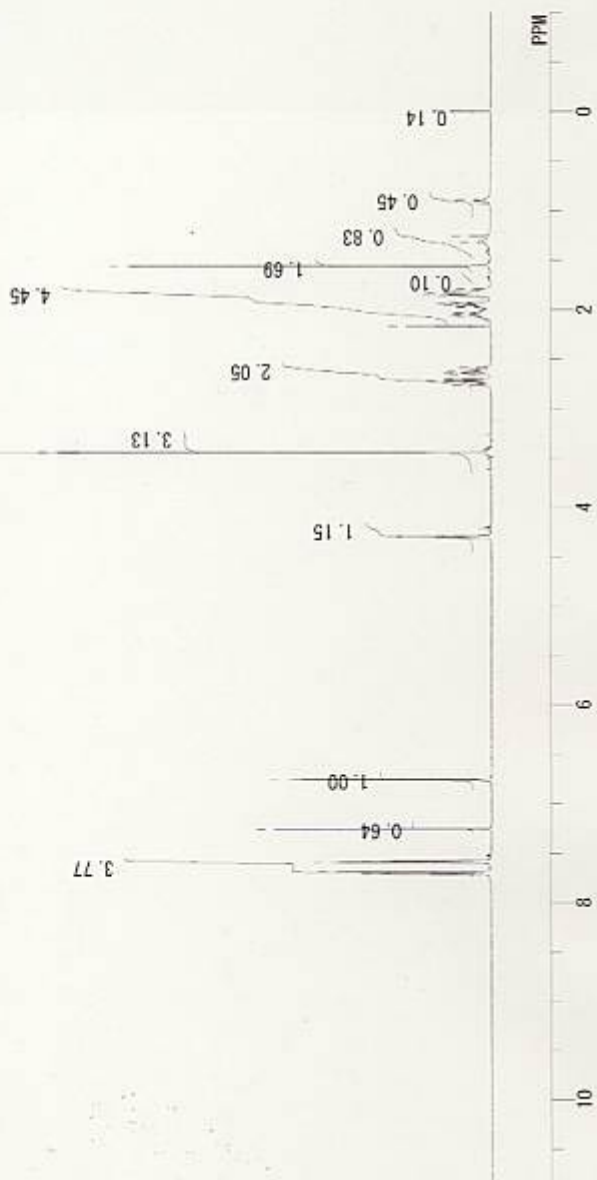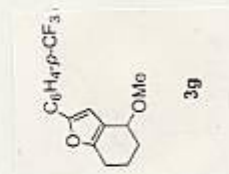

C:\Documents and Settings\VAI\Users\VO

t5-39 product  
Fri Oct 22 14:16:52 2004

DTITLE  
COMMIT  
DATIN  
ORNUC  
EXMOD  
ORFRO  
ORSET  
ORFIN  
POINT  
FREQU  
SCANS  
ACQIN  
PD  
PWI  
IRNUC  
CTEMP  
SLVNT  
EXREF  
BF  
RGAIN

1H  
NON  
399.65 MHz  
124.00 KHz  
10500.00 Hz  
32768  
7953.60 Hz  
8  
4.0993 sec  
2.9010 sec  
5.50 usec  
1H  
24.7 c  
CDCL3  
0.00 ppm  
0.10 Hz  
19

0.000  
1.354  
1.772  
1.776  
1.783  
1.799  
1.804  
1.810  
1.828  
1.837  
1.845  
1.854  
1.917  
1.922  
1.932  
1.939  
1.943  
1.950  
1.956  
1.960  
1.967  
1.974  
1.984  
2.011  
2.019  
2.025  
2.033  
2.039  
2.045  
2.055  
2.060  
2.067  
2.073  
2.086  
2.106  
2.127  
2.147  
2.167  
2.187  
2.207  
2.227  
2.247  
2.267  
2.287  
2.307  
2.327  
2.347  
2.367  
2.387  
2.407  
2.427  
2.447  
2.467  
2.487  
2.507  
2.527  
2.547  
2.567  
2.587  
2.607  
2.620  
2.635  
2.655  
2.685  
2.698  
2.710  
2.726  
2.740  
2.740  
3.432  
3.439  
4.279  
4.289  
4.299  
6.575  
7.141  
7.160  
7.161  
7.252  
7.497

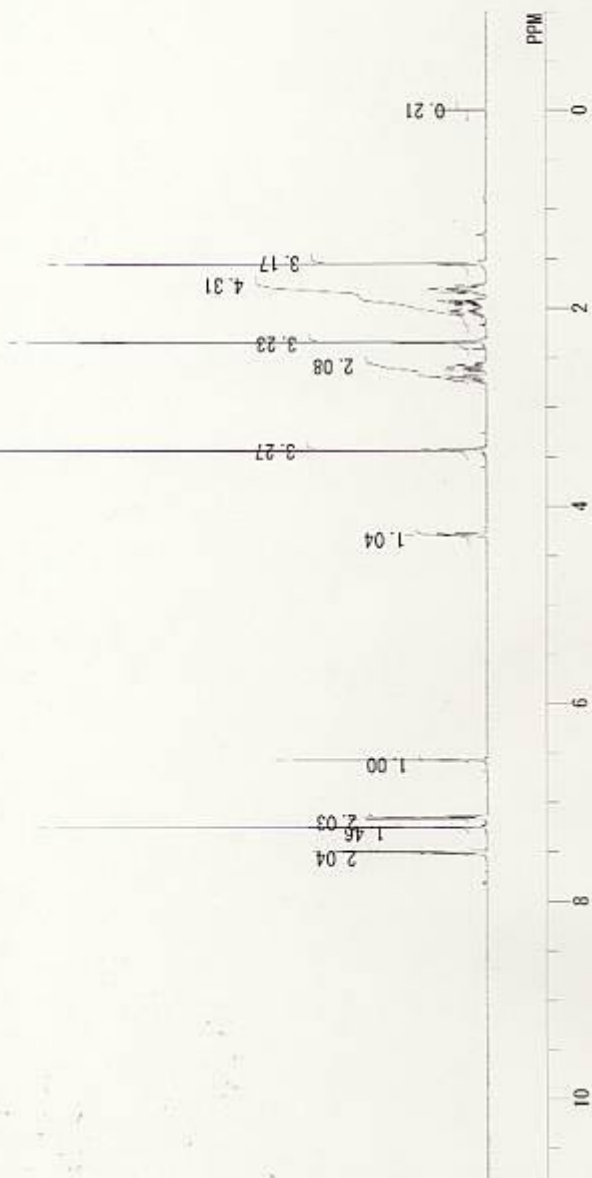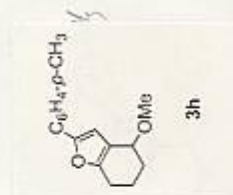

C:\Documents and Settings\All Users\VI

Thu Oct 21 16:49:25 2004

DFILE  
COMMIT  
DATIN  
EXMOD  
OBFRQ  
OBSET  
OBFIN  
POTIT  
FREQU  
SCANS  
ACQTN  
PD  
PMT  
IRNUS  
CTEMP  
SLVIT  
EXREF  
BF  
RGAIN

1H  
NON  
399.65 MHz  
124.00 KHz  
10500.00 Hz  
32768  
7993.60 Hz  
8  
4.0993 sec  
2.9010 sec  
5.50 usec  
1H  
CDCL3  
23.5 c  
0.00 ppm  
0.10 Hz  
14

0.000  
1.570  
1.607  
1.614  
1.622  
1.627  
1.637  
1.642  
1.652  
1.657  
1.684  
1.690  
1.700  
1.705  
1.715  
1.720  
1.728  
1.735  
1.745  
1.752  
1.757  
1.765  
1.780  
1.790  
1.797  
1.876  
1.880  
1.891  
1.898  
1.908  
1.942  
1.978  
1.987  
1.994  
2.000  
2.163  
2.170  
2.184  
2.251  
2.267  
2.520  
2.535  
2.542  
2.557  
2.605  
2.618  
2.631  
2.660  
3.400  
4.219  
4.230  
4.240  
6.129  
6.201  
6.211  
6.215  
6.222

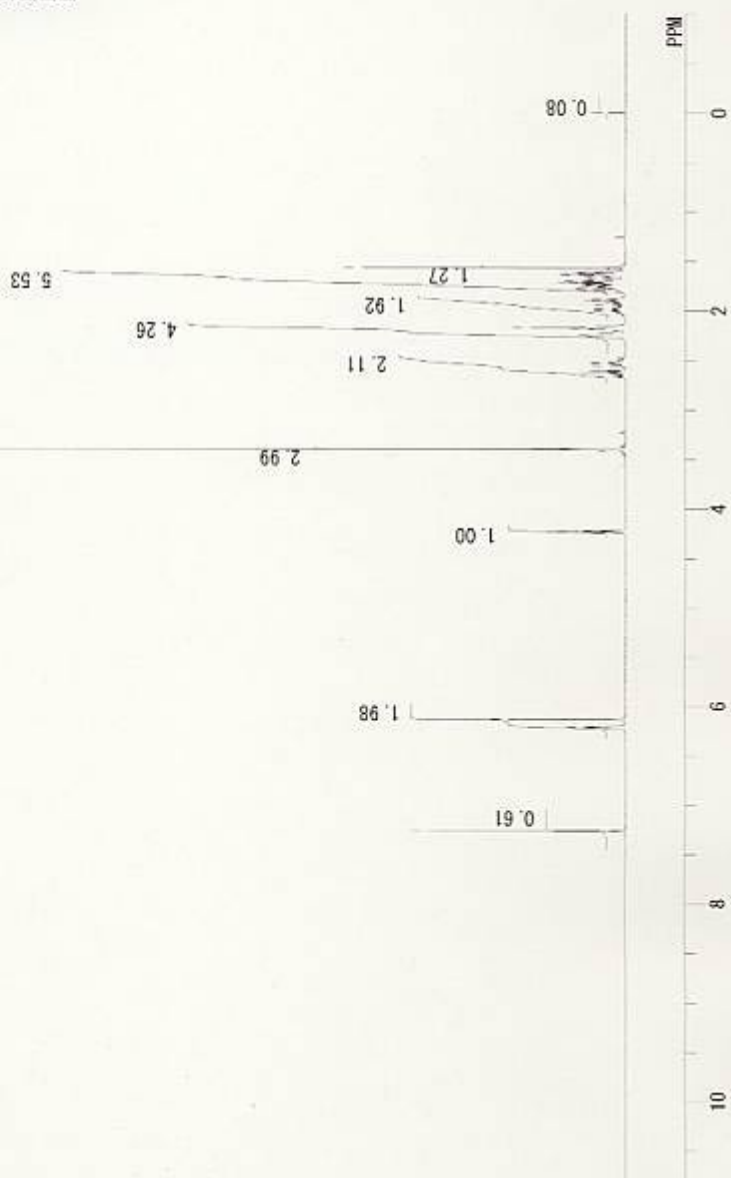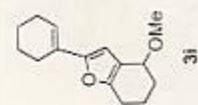

C:\Documents and Settings\All Users\WD

Thu Nov 04 15:08:08 2004

DFILE  
COMET  
DATIN  
GENUC  
EXMOD  
OBSFQ  
OBSFQ  
OBSFQ  
POINT  
FREQ  
SCANS  
ACQTH  
PD  
PWI  
IRNUC  
CTEMP  
SLVNT  
EXREF  
RGAIN

3H  
NON  
399.65 MHz  
124.00 KHz  
10500.00 Hz  
32768  
7993.60 Hz  
8  
4.0993 sec  
2.9010 sec  
5.50 usec  
23.4 g  
CDCl3  
7.24 ppm  
0.10 Hz  
20

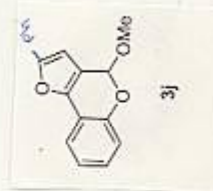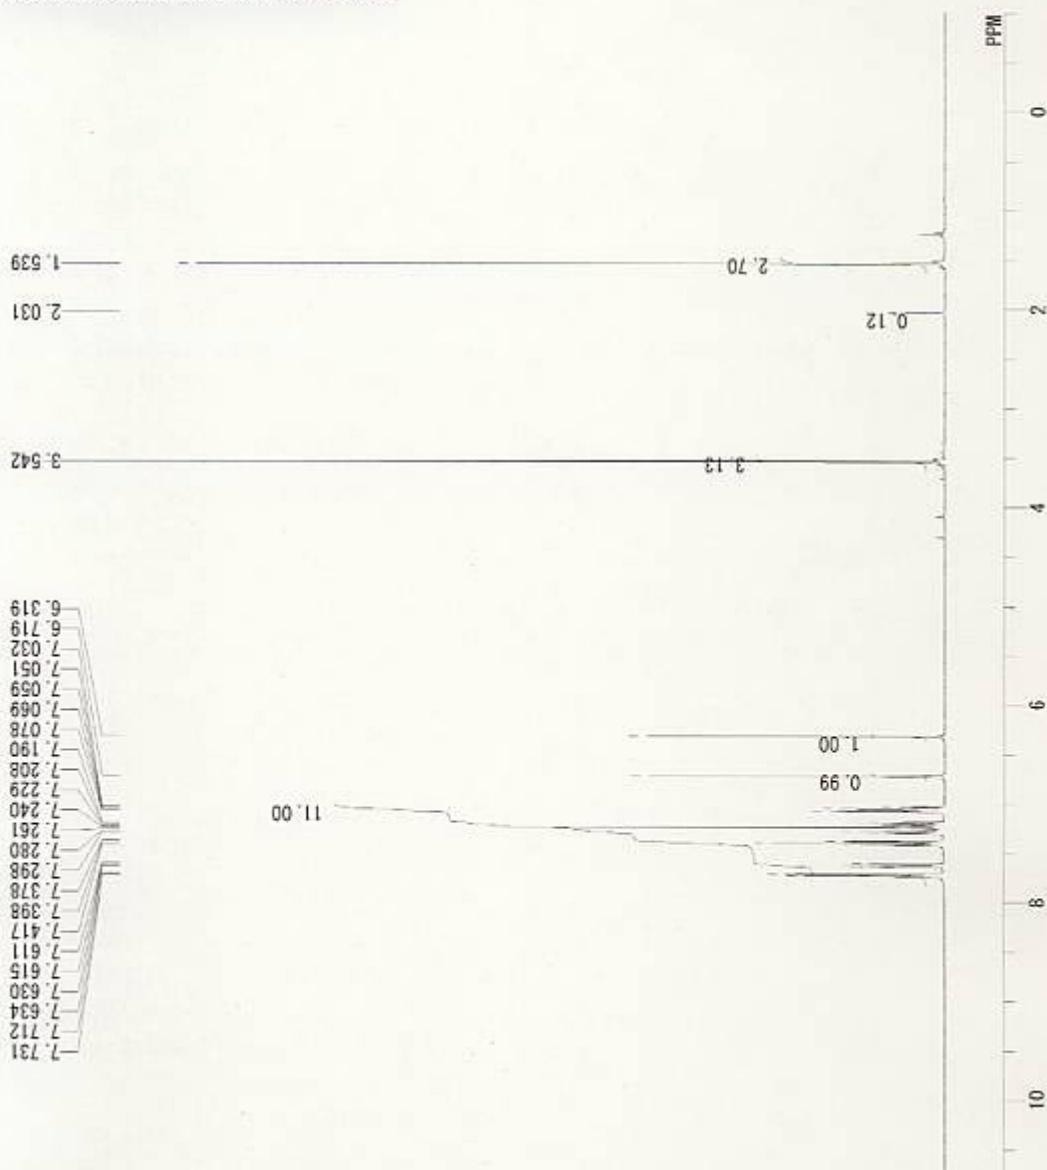

C:\Documents and Settings\All Users\DC

Mon Jan 24 10:28:23 2005

DFILE  
COUNT  
DATE  
NAME  
PULSE  
PROG  
INSTR  
FREQ  
P1  
P2  
PC  
PD  
PR  
PT  
RGAIN  
SOLVENT  
TEMP  
T1  
T2  
T3  
T4  
T5  
T6  
T7  
T8  
T9  
T10  
T11  
T12  
T13  
T14  
T15  
T16  
T17  
T18  
T19  
T20  
T21  
T22  
T23  
T24  
T25  
T26  
T27  
T28  
T29  
T30  
T31  
T32  
T33  
T34  
T35  
T36  
T37  
T38  
T39  
T40  
T41  
T42  
T43  
T44  
T45  
T46  
T47  
T48  
T49  
T50  
T51  
T52  
T53  
T54  
T55  
T56  
T57  
T58  
T59  
T60  
T61  
T62  
T63  
T64  
T65  
T66  
T67  
T68  
T69  
T70  
T71  
T72  
T73  
T74  
T75  
T76  
T77  
T78  
T79  
T80  
T81  
T82  
T83  
T84  
T85  
T86  
T87  
T88  
T89  
T90  
T91  
T92  
T93  
T94  
T95  
T96  
T97  
T98  
T99  
T100

399.65 MHz  
124.00 KHz  
10500.00 Hz  
32768  
7993.60 Hz  
8  
4.0993 sec  
2.9010 sec  
5.50 usec  
18.8 c  
CDCL3  
0.00 ppm  
0.13 Hz  
17

-NMR 0.8:

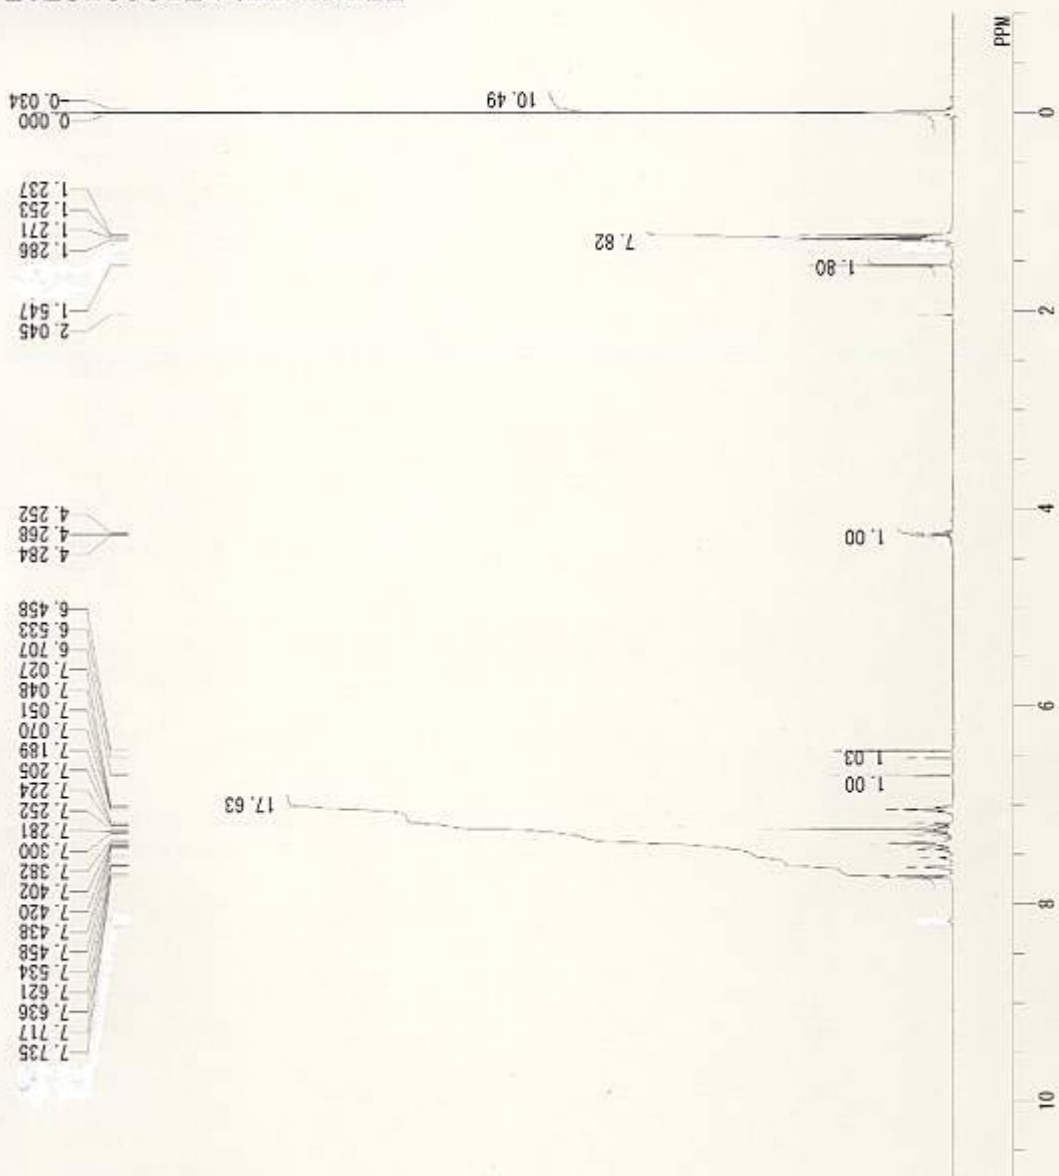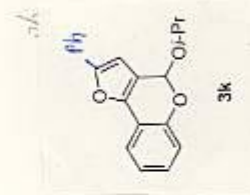

C:\Documents and Settings\VAI\Users\VO

Thu Nov 04 11:55:35 2004

DFILE  
COMMIT  
DATIN  
DIRUC  
EXMOD  
OBFRO  
OBFIN  
POINT  
FREQ  
SCANS  
ACQIN  
PD  
PWI  
IRNUC  
CTEMP  
SLVIT  
EXREF  
BF  
RGAIN

1H  
NON  
399.65 MHz  
124.00 KHz  
10500.00 Hz  
32768  
7953.60 Hz  
8  
4.0993 sec  
2.9010 sec  
5.50 usec  
1H  
CDCL3  
23.7 c  
0.00 ppm  
0.10 Hz  
15

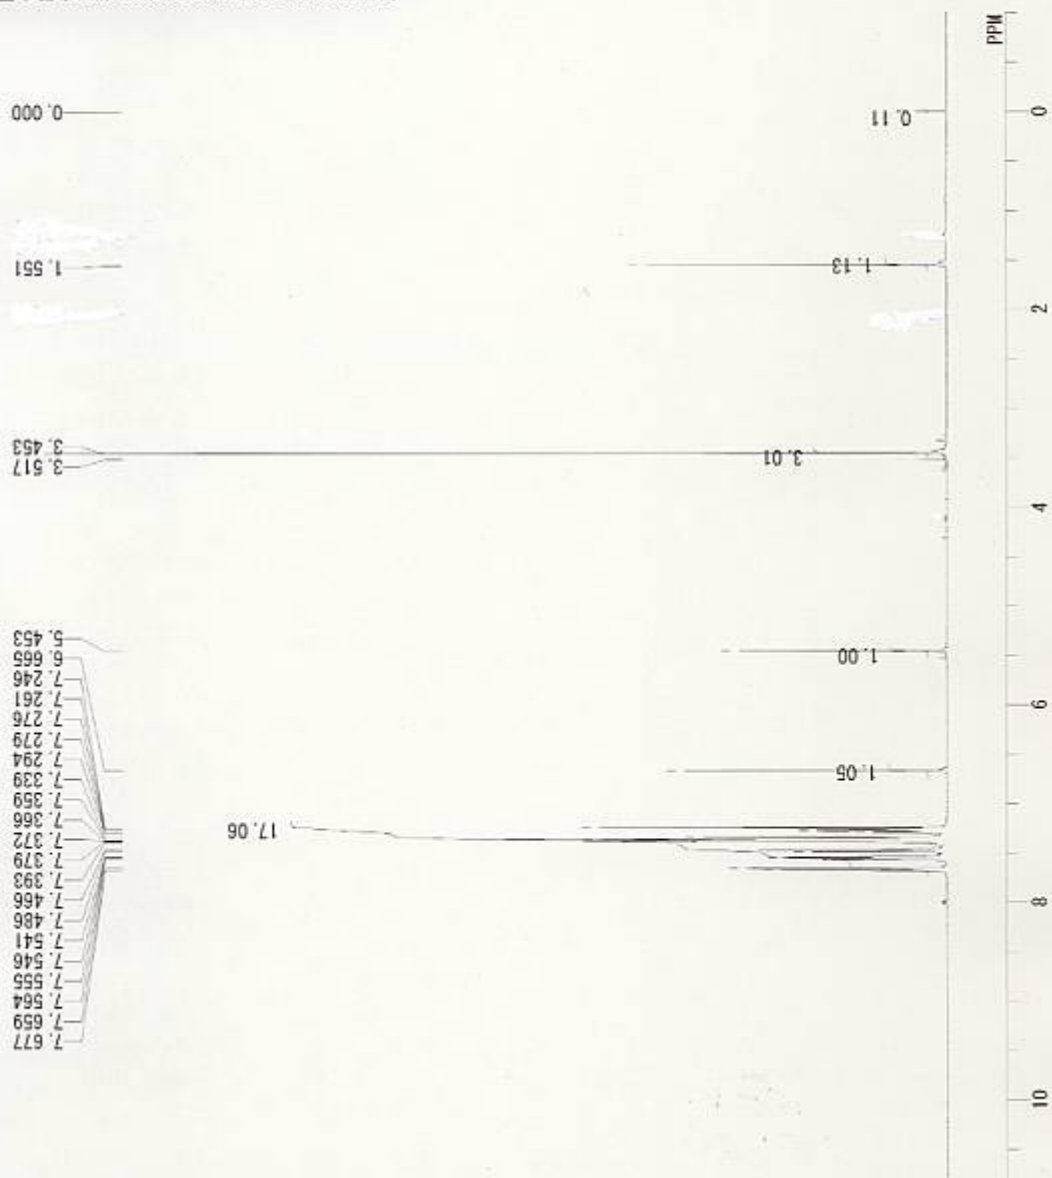

5-45-2  
 5-45-2  
 5-45-2

DEFILE C:\WINNMR98\COMMON\DEFAULT.ALS

COMPT 5-45-2  
 DATIM Mon Nov 29 22:20:06 2004

CHNUC 1H  
 EXXOD NON  
 OBSFQ 399.65 MHz  
 OBSFQ 124.00 KHz  
 OBSFQ 10500.0 Hz  
 POINT 32768  
 FREQU 7993.6 Hz  
 SCANS 8  
 ACQTM 4.099 sec  
 PD 2.901 sec  
 PW1 5.5 us  
 TRUNC 1H  
 TRUNC 23.0 c  
 CTEMP  
 SLVNT CDCL3  
 EXREF 0.00 ppm  
 RF 0.10 Hz  
 RGAIN 20

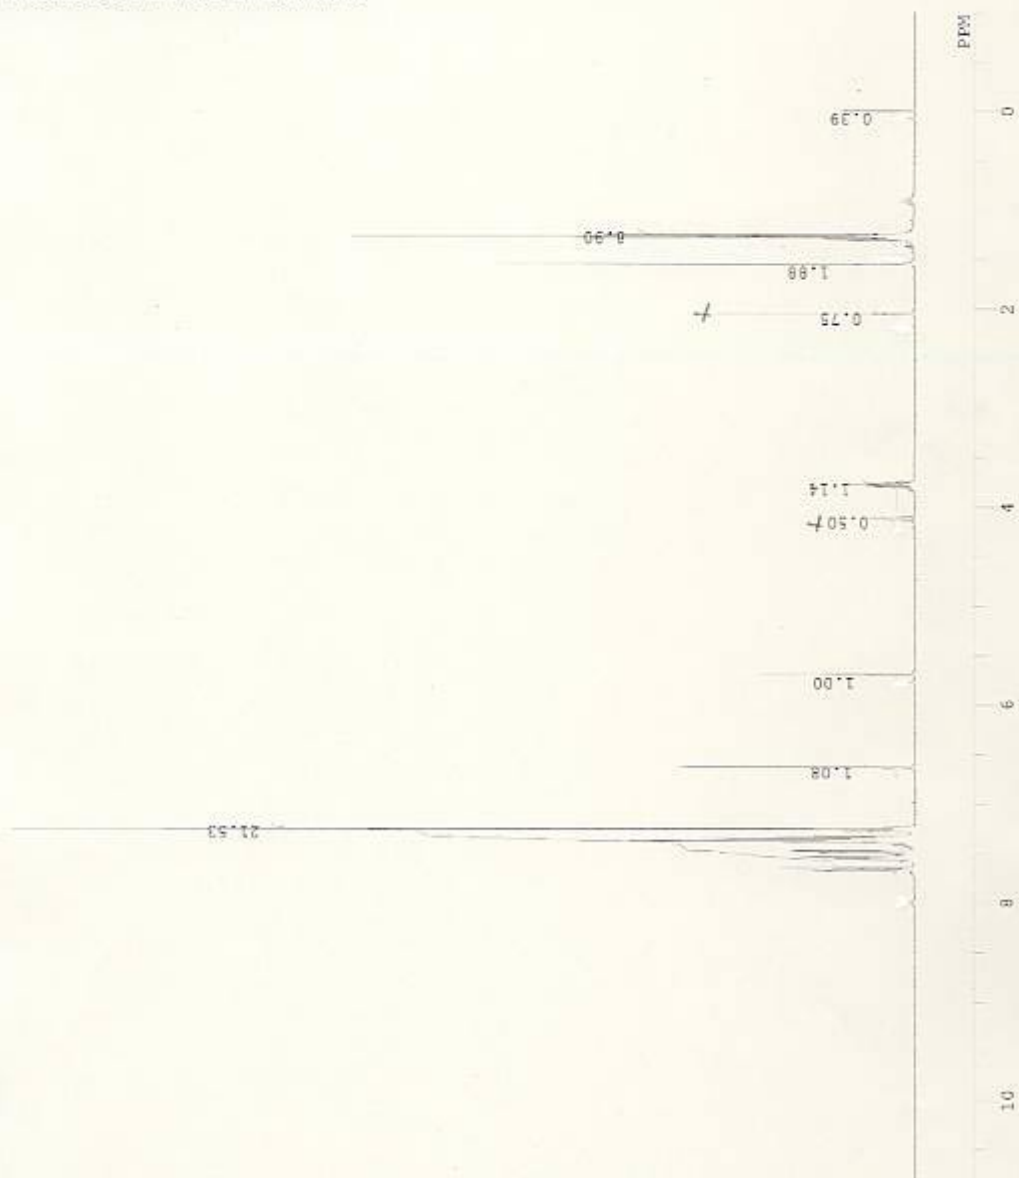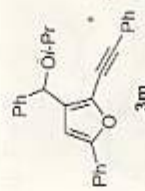



C:\Documents and Settings\All Users\WD

DFILE  
COMMIT  
DATIM  
OBNUC  
EXMOD  
OBFRQ  
OBSET  
OBFIN  
POINT  
FREQ  
SCANS  
ACQTM  
PD  
PW1  
IRNUC  
CTEMP  
SLVNT  
EXREF  
BF  
RGAIN

0.000

1.545

2.377

3.352  
3.373

5.197

6.482  
7.166  
7.184  
7.203  
7.249  
7.263  
7.280  
7.294  
7.314  
7.324  
7.333  
7.344  
7.362  
7.380  
7.397  
7.562  
7.580

Thu Mar 17 13:31:33 2005

1H  
NON

399.65 MHz  
124.00 KHz  
10500.00 Hz

32768  
7993.60 Hz

4.0993 sec  
2.9010 sec

5.50 usec

8

1H

21.8 c

CDCL3

0.00 ppm  
0.10 Hz

17

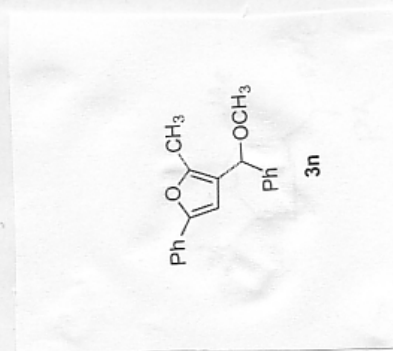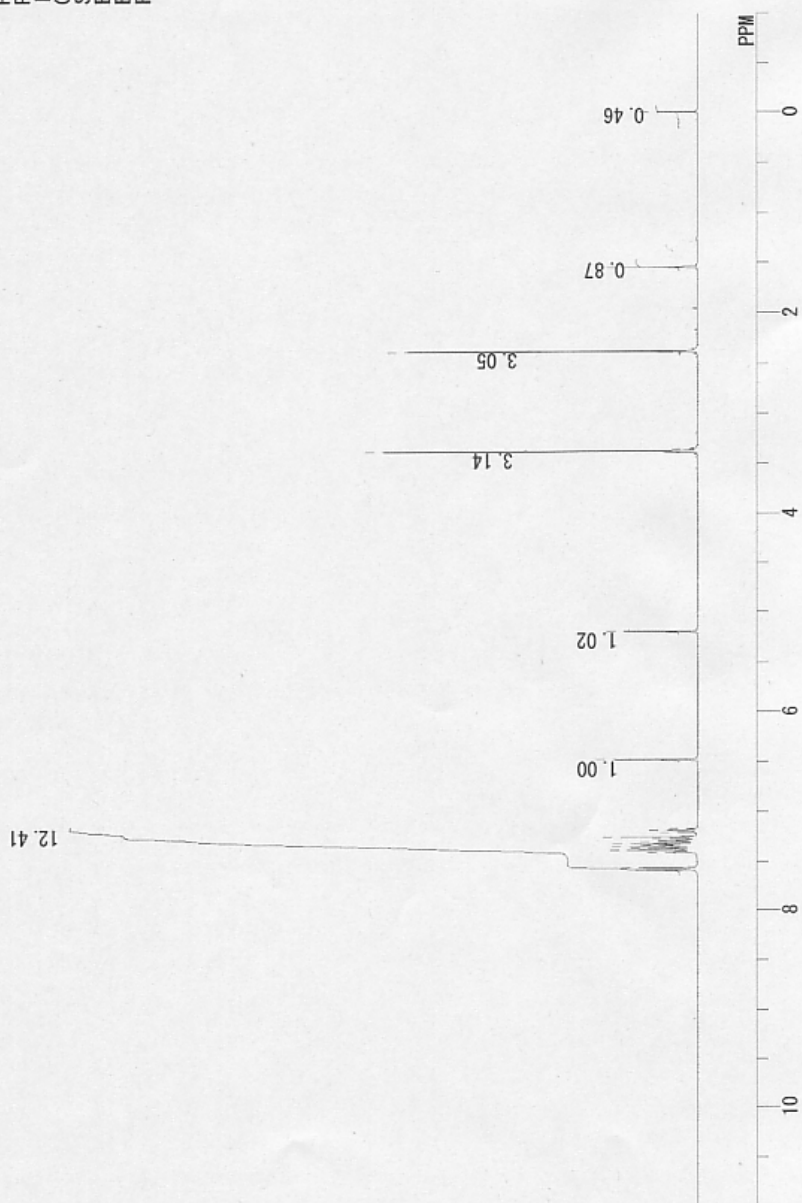



C:\Documents and Settings\All Users\0

DFILE COMINT  
 DATIM Thu Mar 17 12:12:00 2005  
 OBNUC 1H  
 EXMOD NON  
 OBFREQ 399.65 MHz  
 OBFSET 124.00 KHz  
 OBFIN 10500.00 Hz  
 POINT 32768  
 FREQU 7993.60 Hz  
 SCANS 8  
 ACQTM 4.0993 sec  
 PD 2.9010 sec  
 PW1 5.50 usec  
 IRNUC 1H  
 CTEMP 22.1 C  
 SLVNT CDCL3  
 EXREF 0.00 ppm  
 BF 0.10 Hz  
 RGAIN 14

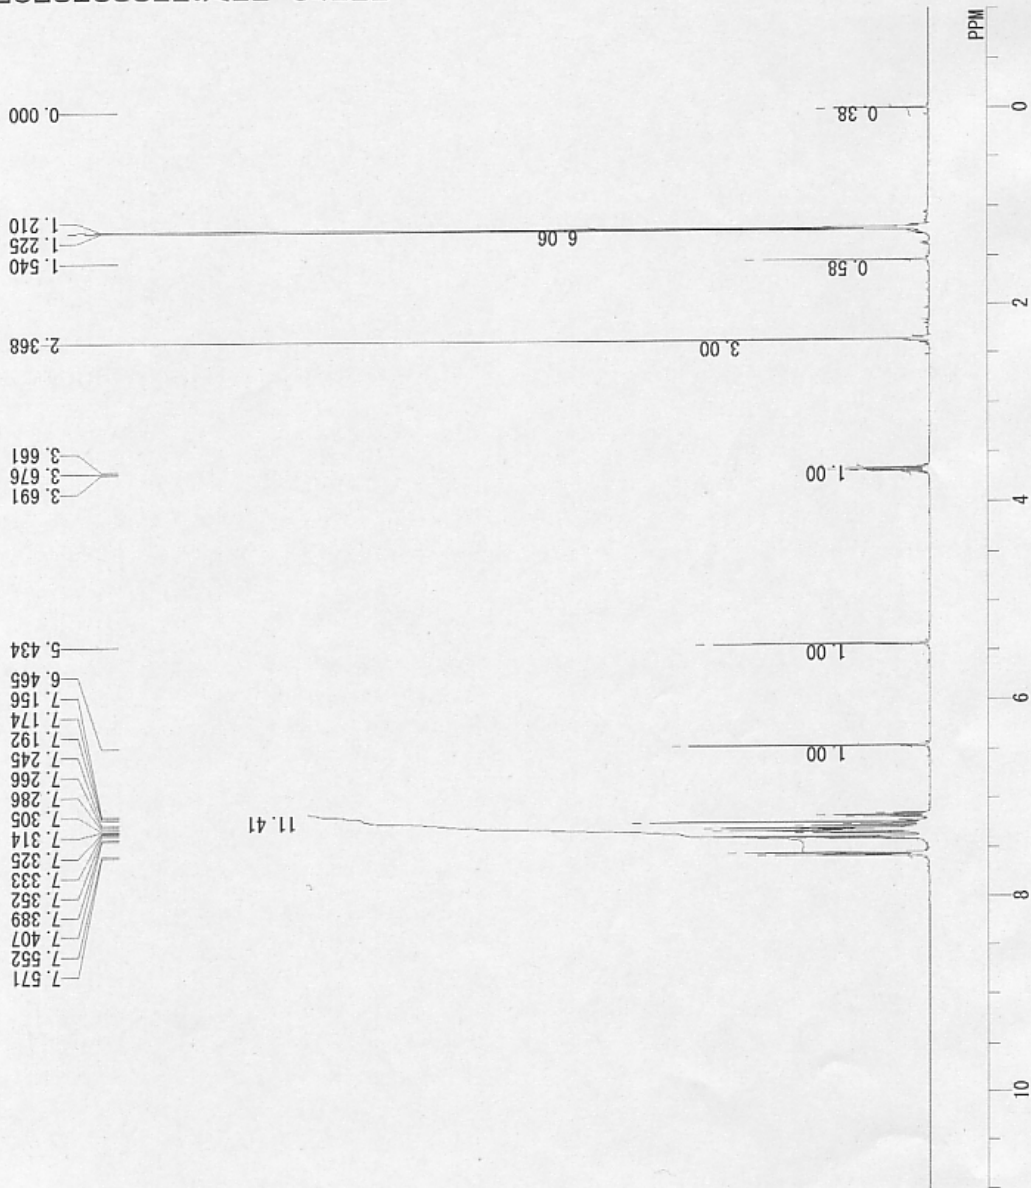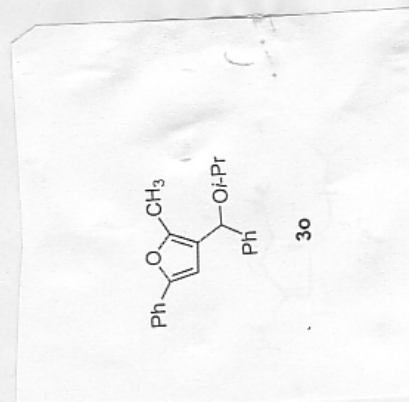

Supplement: Supplementary file 1 [file 5122108]
